# Supplementary material for: Mid-Infrared HgTe Colloidal Quantum Dots In-Situ Passivated by Iodide
Source: MDPI journal article supplement (doi:10.3390/coatings12071033), 2022-07-21
Supplement: s1 [file s1]

# Supplementary Materials: Mid-Infrared HgTe Colloidal Quantum Dots In-Situ Passivated by Iodide

Zekang Liu <sup>1</sup>, Peng Wang <sup>2,\*</sup>, Ran Dong <sup>2</sup>, Wei Gong <sup>1</sup>, Jingjie Li <sup>1</sup>, Dichao Dai <sup>1</sup>, Hui Yan <sup>1</sup> and Yongzhe Zhang <sup>2</sup>

<sup>1</sup> Faculty of Materials and Manufacturing, Key Laboratory of Advanced Functional Materials, Ministry of Education, Beijing University of Technology, Beijing 100124, China; liuzekang08@163.com (Z.L.); 18220872025@163.com (W.G.); lijij1992@emails.bjut.edu.cn (J.L.); ddcam123@163.com (D.D.); hyan@bjut.edu.cn (H.Y.)

<sup>2</sup> Faculty of Information Technology, Key Laboratory of Opto-Electronics Technology, Ministry of Education, Beijing University of Technology, Beijing 100124, China; dongr@emails.bjut.edu.cn (R.D.); yzzhang@bjut.edu.cn (Y.Z.)

\* Correspondence: superwangpeng@bjut.edu.cn

## 1. Chemical Materials

Mercury iodide (Sigma-Aldrich, Saint Louis, MO, USA,  $\geq 99.0\%$ ), bis(trimethylsilyl)telluride (Acros, Geel, Belgium, 98%), Oleylamine (Aladdin, Los Angeles, CA, USA, 80%–90%), Tetrachloroethylene (Aladdin, GR 99.5%), n-Hexane (Aladdin, GC  $\geq 98\%$ ), Methanol anhydrous (AR, Tianjin, China,  $\geq 99.5\%$ ), Ethanol absolute (AR, Tianjin, China,  $\geq 99.7\%$ ).

## 2. Size Distribution Histograms and TEM Images of Grains at Different Growth Temperatures

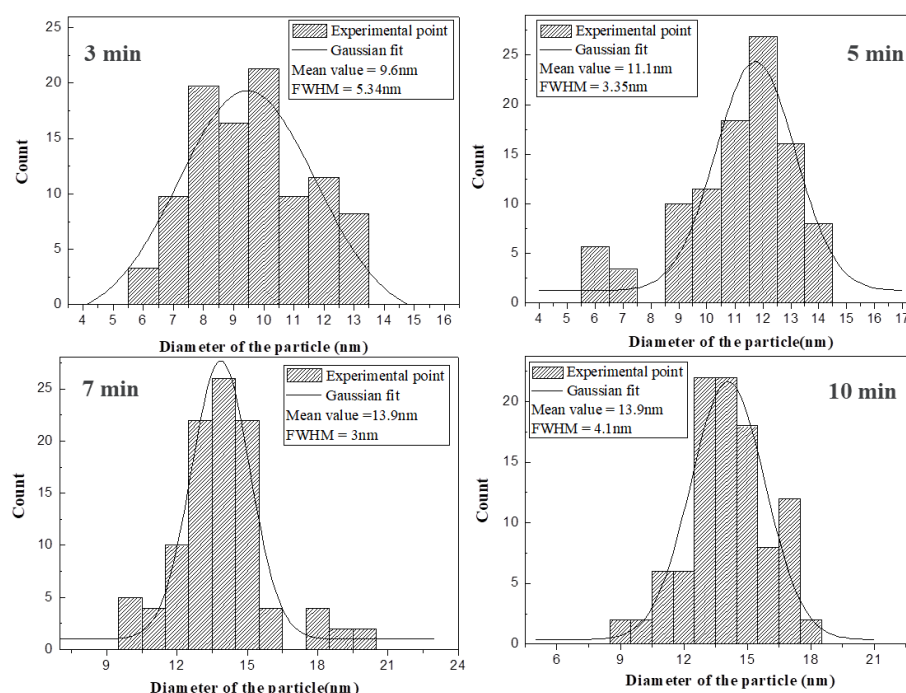

**Citation:** Liu, Z.; Wang, P.; Dong, R.; Gong, W.; Li, J.; Dai, D.; Yan, H.; Zhang, Y. Mid-Infrared HgTe Colloidal Quantum Dots In-Situ Passivated by Iodide. *Coatings* **2022**, *12*, 1033. <https://doi.org/10.3390/coatings12071033>

Academic Editor: Anatoly Kovalev

Received: 30 May 2022

Accepted: 13 July 2022

Published: 21 July 2022

**Publisher's Note:** MDPI stays neutral with regard to jurisdictional claims in published maps and institutional affiliations.

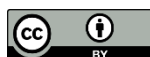

**Copyright:** © 2022 by the authors. Submitted for possible open access publication under the terms and conditions of the Creative Commons Attribution (CC BY) license (<https://creativecommons.org/licenses/by/4.0/>).

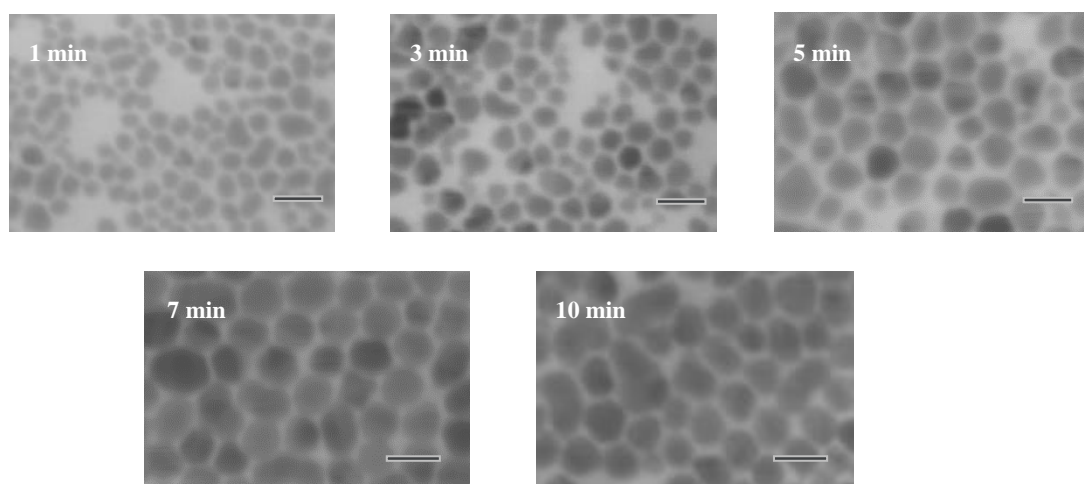

**Figure S1.** TEM images and histogram of as-prepared HgTe CQDs sampled under 113 °C at 1 min, 3 min, 5 min, 7 min, 10 min reaction time, Scale bar, 20 nm. Histogram of diameters for 100 particles.

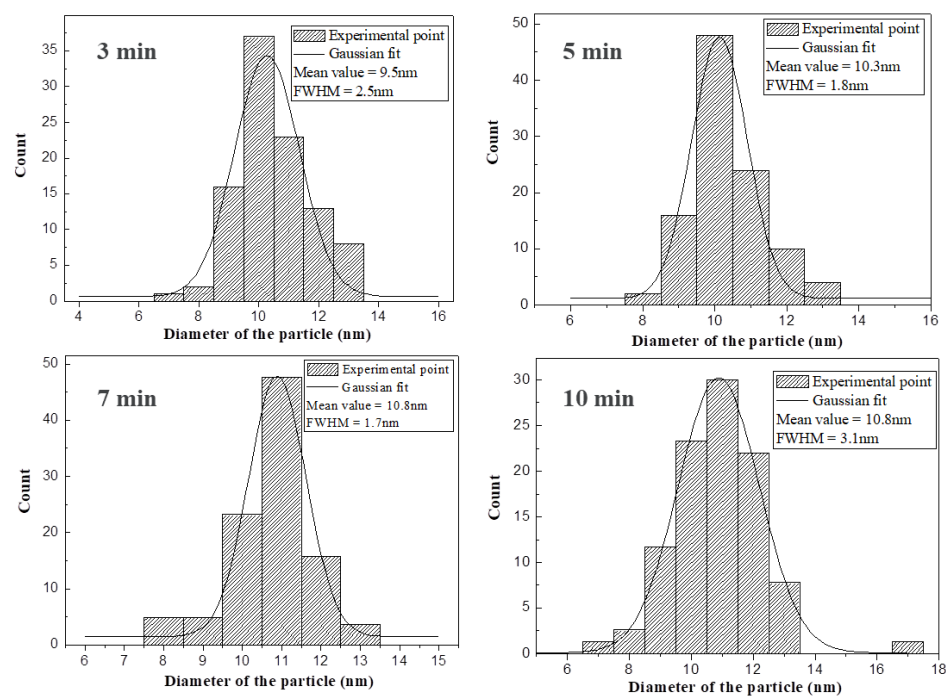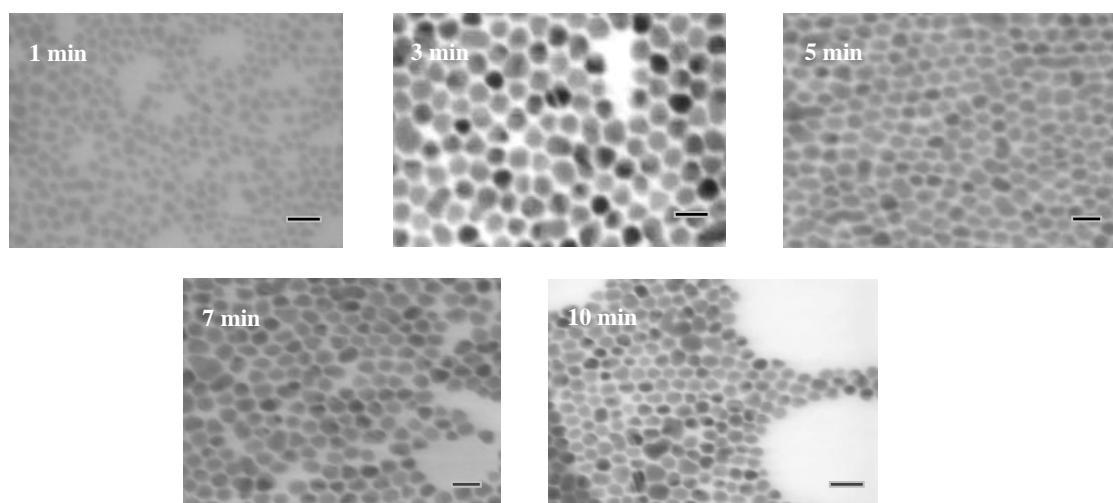

**Figure S2.** TEM images and histogram of as-prepared HgTe CQDs sampled under 115 °C at 1 min, 3 min, 5 min, 7 min, 10 min reaction time, Scale bar, 20 nm. Histogram of diameters for 100 particles.

### 3. XPS Overview

The overview is acquired with a 100 eV pass energy and a with a 1 eV resolution, as shown in Figure S3.

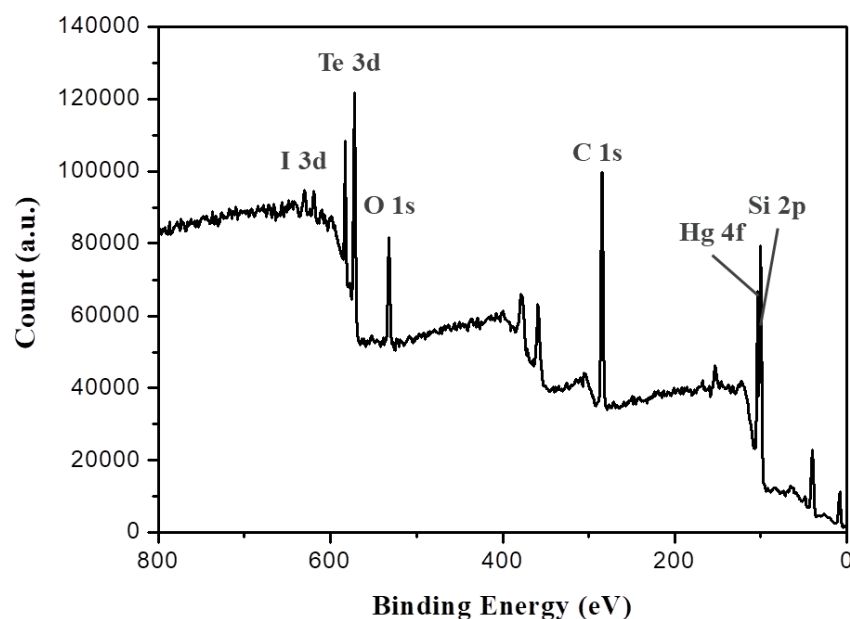

**Figure S3.** XPS overview for a thin film of I<sup>-</sup> in situ passivated HgTe CQDs deposited on a Si/SiO<sub>2</sub> substrate.

### 4. EDX Spectrum

Figure S4 shows the EDX surface total spectrum of I<sup>-</sup> in situ passivated HgTe CQDs film.

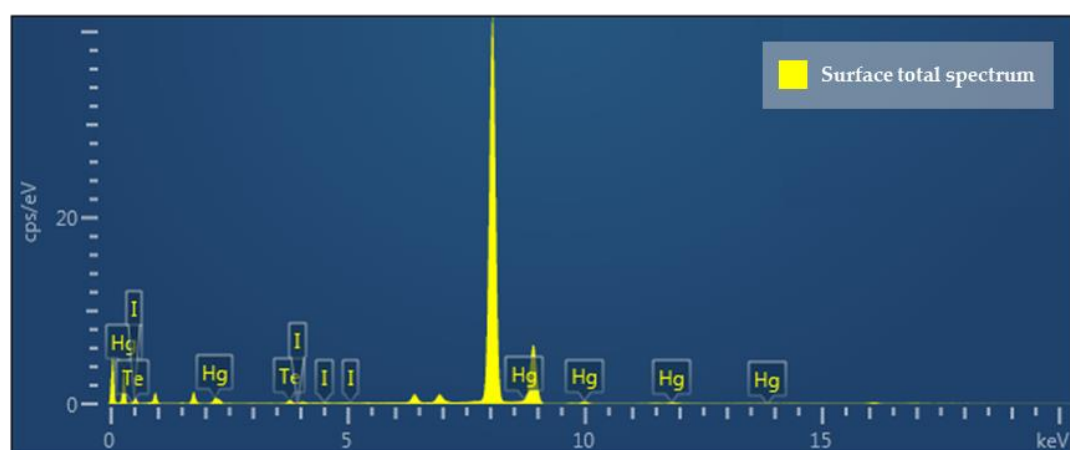

**Figure S4.** EDX surface total spectrum of I<sup>-</sup> in situ passivated HgTe CQDs film.
