# Supplementary material for: Mid-Infrared HgTe Colloidal Quantum Dots In-Situ Passivated by Iodide
Source: MDPI journal article supplement (doi:10.3390/coatings12071033), 2022-07-21
Supplement: s1 [file s1]

Archive with 1 entries (1 files):
- coatings-1772222-supplementary.pdf
